# Supplementary material
Source: MDPI journal article supplement (https://www.mdpi.com/search?q=jcm-10-05507)
Supplement: s001 [file jcm-10-05507-s001.zip]

**Table S1.** The preferred term (PT) and code included in standardized MedDRA query (SMQ): 20000024.

| angioedema (SMQ: 20000024) |                                       |                   |                                      |
|----------------------------|---------------------------------------|-------------------|--------------------------------------|
| Narrow scope terms         |                                       | Broad scope terms |                                      |
| code                       | PT                                    | code              | PT                                   |
| 10081035                   | Acquired C1 inhibitor deficiency      | 10003800          | Auricular swelling                   |
| 10060934                   | Allergic oedema                       | 10006294          | Breast oedema                        |
| 10002424                   | Angioedema                            | 10006312          | Breast swelling                      |
| 10052250                   | Circumoral oedema                     | 10008589          | Choking                              |
| 10081703                   | Circumoral swelling                   | 10008590          | Choking sensation                    |
| 10010726                   | Conjunctival oedema                   | 10013700          | Drug hypersensitivity                |
| 10011033                   | Corneal oedema                        | 10014025          | Ear swelling                         |
| 10015029                   | Epiglottic oedema                     | 10067450          | Endotracheal intubation              |
| 10052139                   | Eye oedema                            | 10058061          | Gastrointestinal oedema              |
| 10015967                   | Eye swelling                          | 10018092          | Generalised oedema                   |
| 10015993                   | Eyelid oedema                         | 10067639          | Genital swelling                     |
| 10016029                   | Face oedema                           | 10020751          | Hypersensitivity                     |
| 10049305                   | Gingival oedema                       | 10052390          | Laryngeal dyspnoea                   |
| 10018291                   | Gingival swelling                     | 10059639          | Laryngeal obstruction                |
| 10066837                   | Gleich's syndrome                     | 10048961          | Localised oedema                     |
| 10019860                   | Hereditary angioedema                 | 10028748          | Nasal obstruction                    |
| 10080955                   | Hereditary angioedema                 | 10028750          | Nasal oedema                         |
|                            | with C1 esterase inhibitor deficiency |                   |                                      |
| 10073257                   | Idiopathic angioedema                 | 10059012          | Nipple oedema                        |
| 10021247                   | Idiopathic urticaria                  | 10058680          | Nipple swelling                      |
| 10076229                   | Intestinal angioedema                 | 10061877          | Obstructive airways disorder         |
| 10023845                   | Laryngeal oedema                      | 10030095          | Oedema                               |
| 10023893                   | Laryngotracheal oedema                | 10080039          | Oedema blister                       |
| 10070492                   | Limbal swelling                       | 10030104          | Oedema genital                       |
| 10024558                   | Lip oedema                            | 10030111          | Oedema mucosal                       |
| 10024570                   | Lip swelling                          | 10061317          | Oedema neonatal                      |
| 10075203                   | Mouth swelling                        | 10030124          | Oedema peripheral                    |
| 10067317                   | Oculorespiratory syndrome             | 10031051          | Orbital oedema                       |
| 10030110                   | Oedema mouth                          | 10066774          | Penile oedema                        |
| 10078783                   | Oropharyngeal oedema                  | 10034319          | Penile swelling                      |
| 10031118                   | Oropharyngeal swelling                | 10078818          | Perinephric oedema                   |
| 10056998                   | Palatal oedema                        | 10049779          | Peripheral oedema neonatal           |
| 10074403                   | Palatal swelling                      | 10048959          | Peripheral swelling                  |
| 10034545                   | Periorbital oedema                    | 10062109          | Reversible airways obstruction       |
| 10056647                   | Periorbital swelling                  | 10039755          | Scrotal oedema                       |
| 10034829                   | Pharyngeal oedema                     | 10039759          | Scrotal swelling                     |
| 10082270                   | Pharyngeal swelling                   | 10058679          | Skin oedema                          |
| 10057431                   | Scleral oedema                        | 10053262          | Skin swelling                        |
| 10042682                   | Swelling face                         | 10076991          | Soft tissue swelling                 |
| 10042690                   | Swelling of eyelid                    | 10042241          | Stridor                              |
| 10042727                   | Swollen tongue                        | 10042444          | Suffocation feeling                  |
| 10043967                   | Tongue oedema                         | 10042674          | Swelling                             |
| 10044296                   | Tracheal oedema                       | 10079645          | Therapeutic product cross-reactivity |
| 10046735                   | Urticaria                             | 10043528          | Throat tightness                     |
| 10046740                   | Urticaria cholinergic                 | 10044291          | Tracheal obstruction                 |
| 10052568                   | Urticaria chronic                     | 10044320          | Tracheostomy                         |
| 10046750                   | Urticaria papular                     | 10045240          | Type I hypersensitivity              |
|                            |                                       | 10067775          | Upper airway obstruction             |
|                            |                                       | 10063818          | Vaginal oedema                       |
|                            |                                       | 10065768          | Visceral oedema                      |
|                            |                                       | 10047763          | Vulval oedema                        |
|                            |                                       | 10071211          | Vulvovaginal swelling                |
|                            |                                       | 10047924          | Wheezing                             |

PT: preferred term.
